# Supplementary material for: Molecular characterization of the evolution of premalignant lesions in the upper aerodigestive tract
Source: PubMed Central journal article supplement (PMC11067708; doi:10.3389/fonc.2024.1364958), 2024-04-19

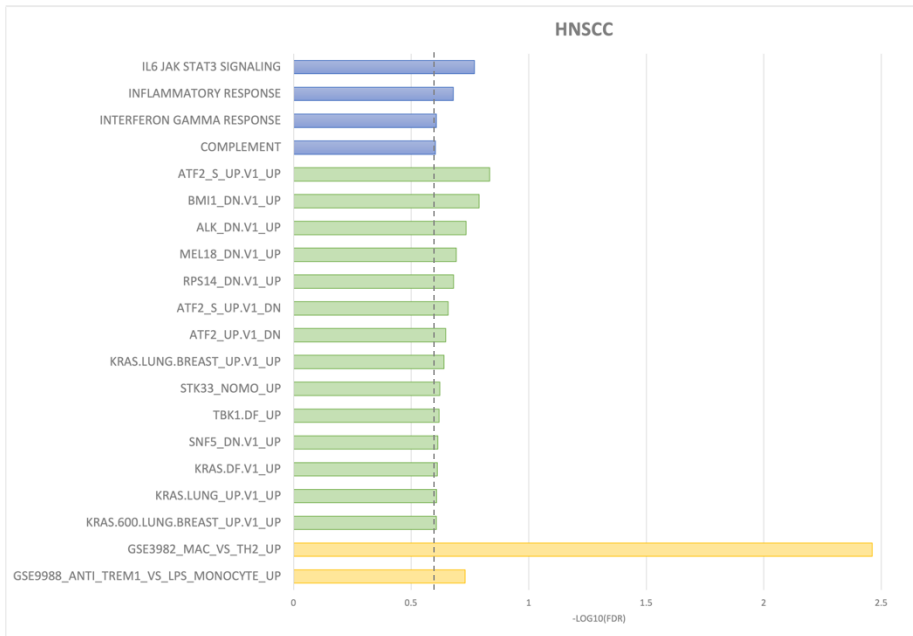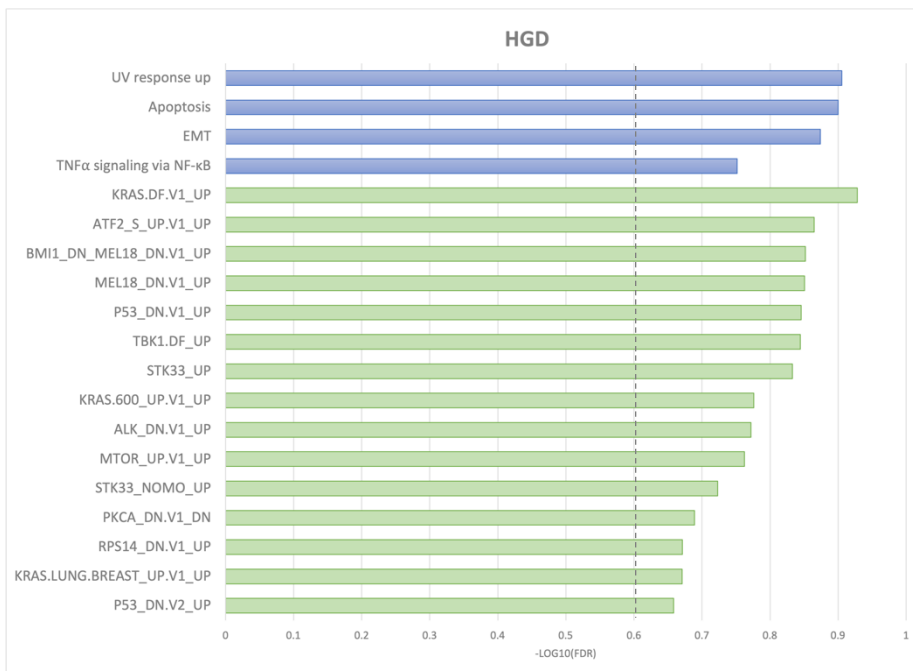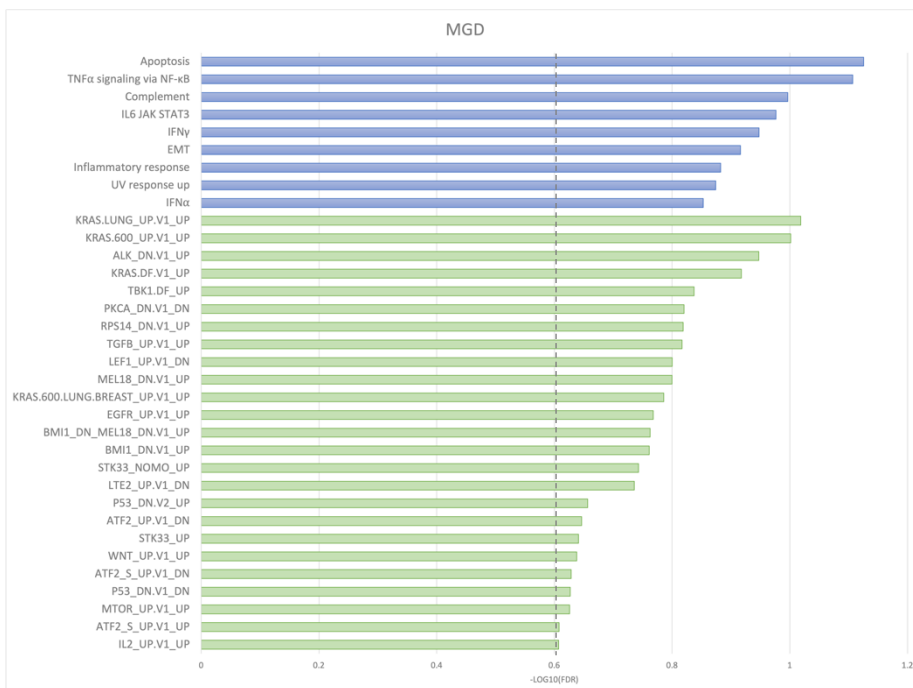

Supplement: DataSheet_1.pdf [file DataSheet_1.pdf]
