# Supplementary material for: Molecular characterization of the evolution of premalignant lesions in the upper aerodigestive tract
Source: PubMed Central journal article supplement (PMC11067708; doi:10.3389/fonc.2024.1364958), 2024-04-19
Supplement: DataSheet_2.pdf [file DataSheet_2.pdf]

| <b>HALLMARK_INTERFERON_GAMMA</b> | <b>NES</b> | <b>NOM <i>p</i></b> | <b>FDR</b> |
|----------------------------------|------------|---------------------|------------|
| HNSCC vs. Normal                 | 1.62       | 0.03                | 0.08       |
| HGD vs. Normal                   | 1.79       | 0.007               | 0.014      |
| MGD vs. Normal                   | 1.86       | 0.004               | 0.036      |

  

| <b>HALLMARK_INTERFERON_ALPHA</b> | <b>NES</b> | <b>NOM <i>p</i></b> | <b>FDR</b> |
|----------------------------------|------------|---------------------|------------|
| HNSCC vs. Normal                 | 1.68       | 0.02                | 0.11       |
| HGD vs. Normal                   | 1.91       | 0.004               | 0.006      |
| MGD vs. Normal                   | 1.85       | 0.01                | 0.02       |
